# Supplementary material for: Induced transcriptional profiling of phenylpropanoid pathway genes increased flavonoid and lignin content in Arabidopsis leaves in response to microbial products
Source: PubMed Central journal article supplement (PMC4021374; doi:10.1186/1471-2229-14-84), 2014-04-01

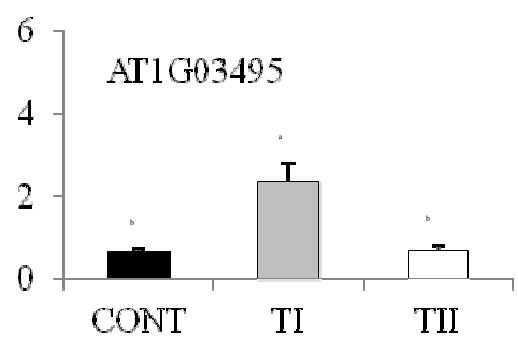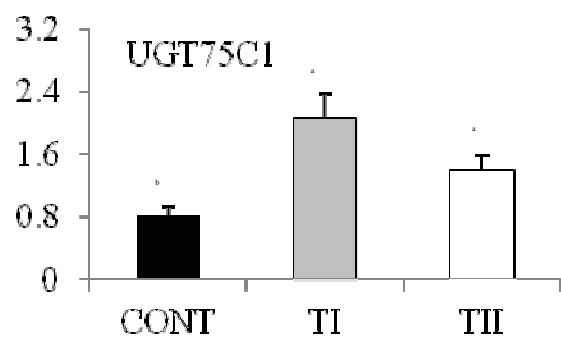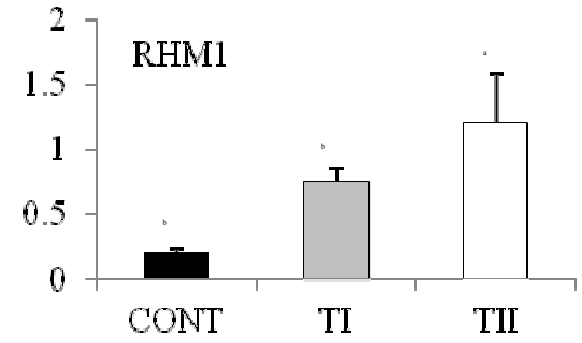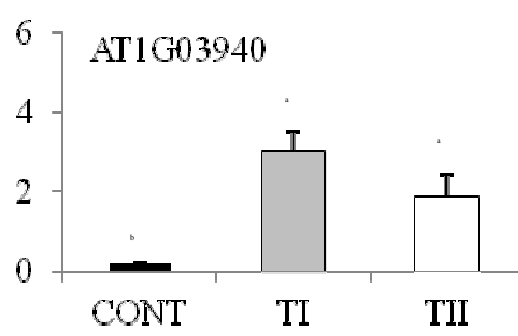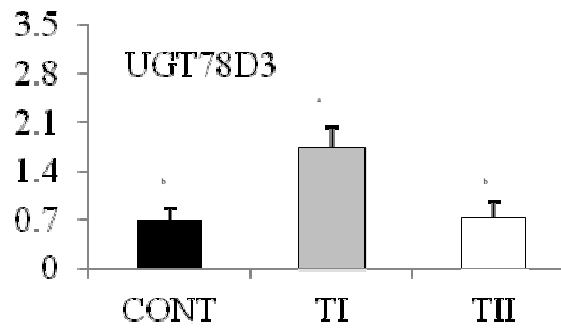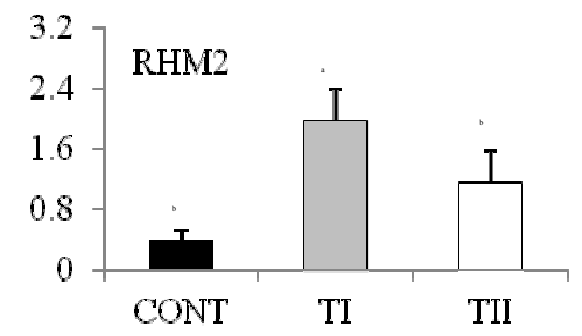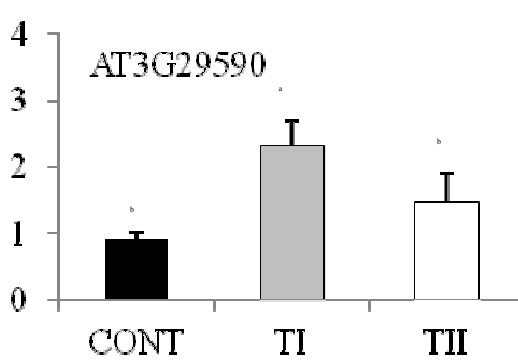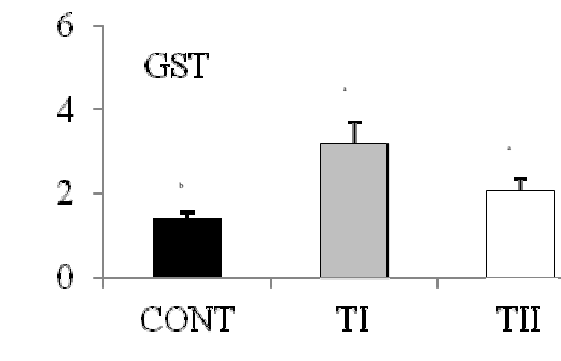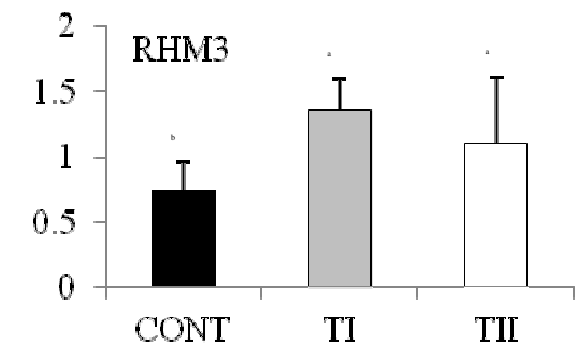

.....

.....

.....



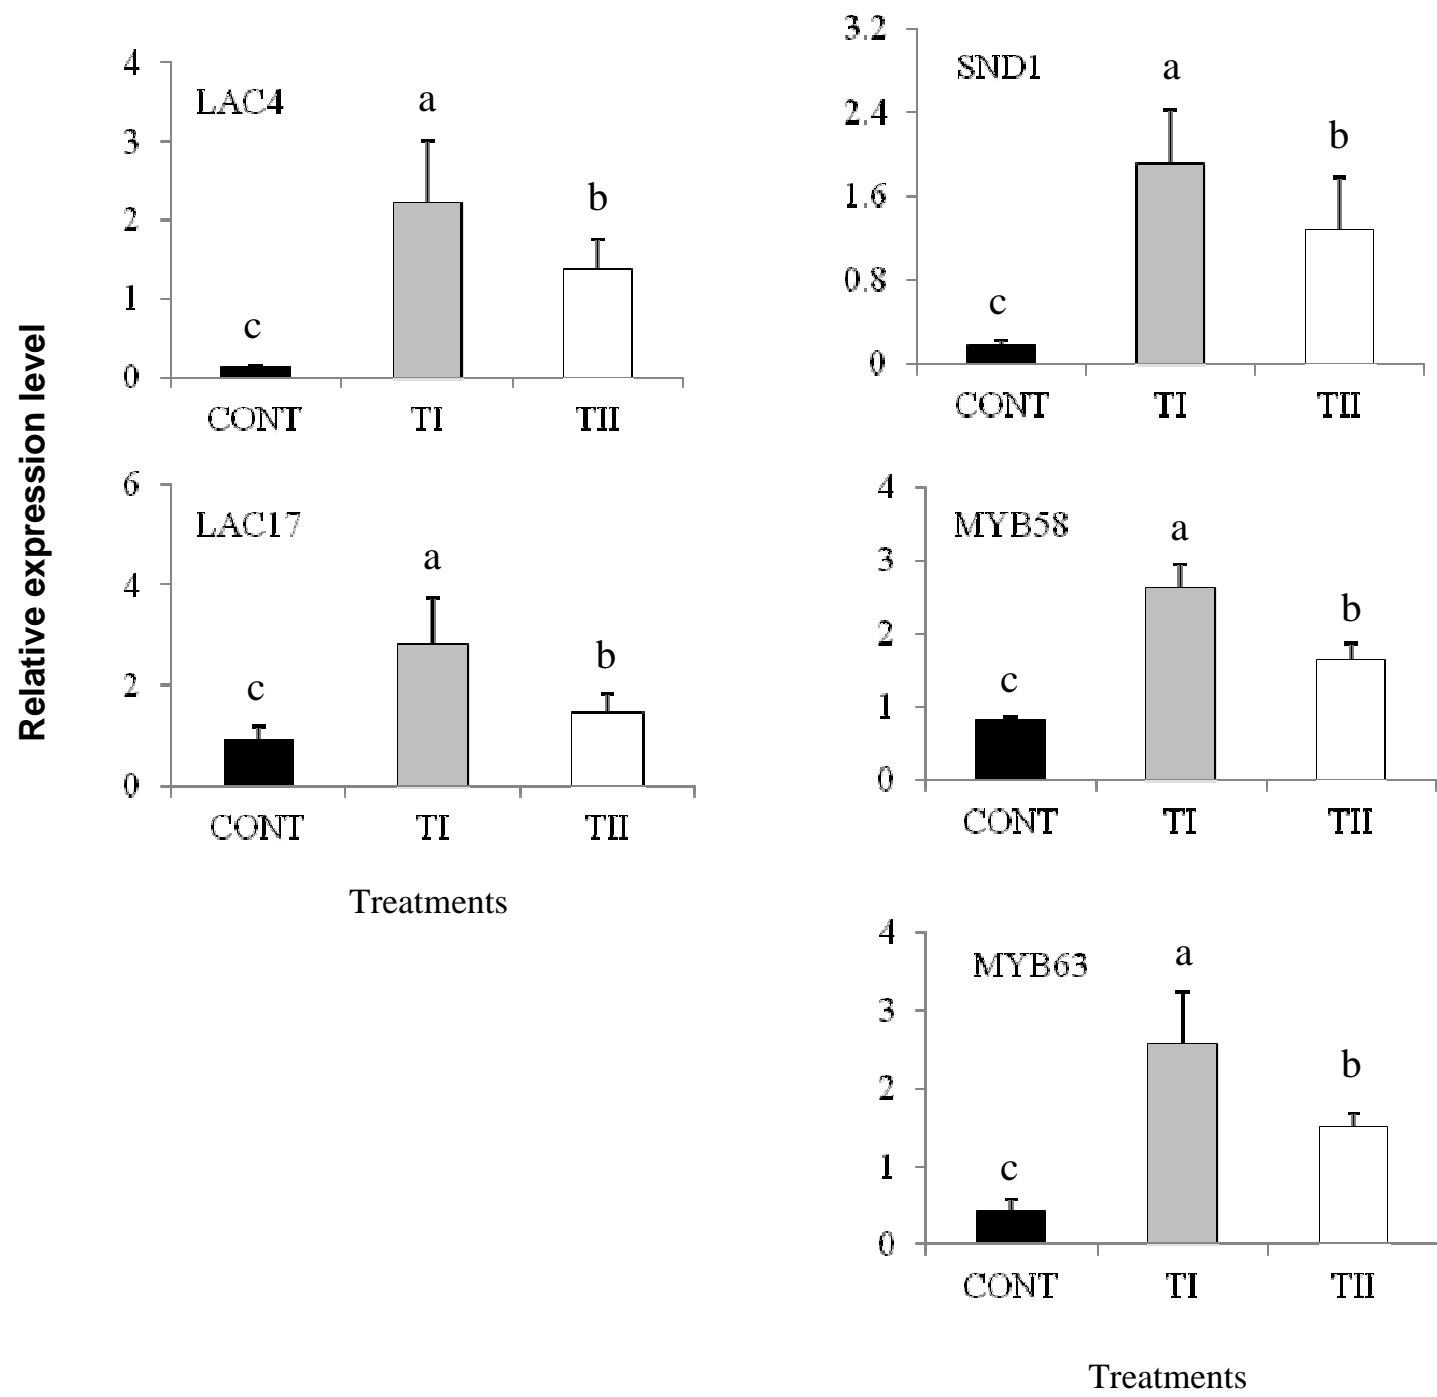

Supplement: 1471-2229-14-84-S3.pdf [file 1471-2229-14-84-S3.pdf]
